# Supplementary material for: A point mutation in AgrC determines cytotoxic or colonizing properties associated with phenotypic variants of ST22 MRSA strains
Source: Springer Nature journal article supplement (doi:10.1038/srep31360), 2016-08-11
Supplement: 41598_2016_BFsrep31360_MOESM35_ESM.pdf [file 41598_2016_BFsrep31360_MOESM35_ESM.pdf]

1 **Supplementary Information**

2 **A point mutation in AgrC determines cytotoxic or colonizing properties associated**  
3 **with phenotypic variants of ST22 MRSA strains.**

4 Srikanth Mairpady Shambat<sup>1,¶</sup>, Nikolai Siemens<sup>1,¶</sup>, Ian R. Monk<sup>2</sup>, Disha B. Mohan<sup>3</sup>, Santhosh  
5 Mukundan<sup>4</sup>, Karthickeyan Chella Krishnan<sup>4</sup>, Sushma Prabhakara<sup>5</sup>, Johanna Snäll<sup>1</sup>, Angela  
6 Kearns<sup>6</sup>, Francois Vandenesch<sup>7</sup>, Mattias Svensson<sup>1</sup>, Malak Kotb<sup>4</sup>, Balasubramanian Gopal<sup>3</sup>,  
7 Gayathri Arakere<sup>5</sup>, and Anna Norrby-Teglund<sup>1\*</sup>

8

9 <sup>¶</sup>These authors contributed equally to this work

10

11 <sup>1</sup>Karolinska Institutet, Center for Infectious Medicine, Karolinska University Hospital  
12 Huddinge, 141 86, Sweden; <sup>2</sup>Department of Microbiology and Immunology, University of  
13 Melbourne, Victoria, 3010, Australia; <sup>3</sup>Molecular Biophysics Unit, Indian Institute of Science,  
14 Bangalore, 560012, India; <sup>4</sup>Department of Basic Sciences, School of Medicine and Health  
15 Sciences, University of North Dakota, ND, 58202-9037, USA; <sup>5</sup>Society for Innovation and  
16 Development, Indian Institute of Science, Bangalore, 560012, India; <sup>6</sup>National Infection  
17 Service, Public Health England (PHE), Colindale, London, NW95EQ, UK; <sup>7</sup>CIRI, International  
18 Center for Infectiology Research; Inserm, U1111; CNRS, Université Lyon 1; École Normale  
19 Supérieure de Lyon; French National Reference Center for Staphylococci, Hospices Civils de  
20 Lyon, Lyon, UMR5308, France

21

22 \* Corresponding author: Anna Norrby-Teglund, Karolinska Institutet, Center for Infectious  
23 Medicine, Karolinska University Hospital Huddinge, 141 86, Sweden; phone: +46858583297;  
24 Email: Anna.Norrby-Teglund@ki.se

25

26 **Supplementary Methods**

27 **Gel Filtration Chromatography for AgrC<sub>Y223C</sub>**

28 Analytical size exclusion experiments were conducted using Superdex S200 column to  
29 determine the oligomeric status of AgrC<sub>Y223C</sub>. Also, AgrC<sub>Y223C</sub> was incubated with DTT to  
30 examine their effect on the Cysteine 223 and therefore on the oligomeric status of AgrC<sub>Y223C</sub>.

31 **Toxin ELISAs**

32 Levels of  $\alpha$ -toxin and PVL were determined by ELISA using toxin-specific antibodies  
33 provided by GSK Vaccines (Belgium) and bioMérieux R&D Immunodiagnostic (France),  
34 respectively<sup>1,2</sup>.

35

36 **SupplementaryTable 1. Strains and plasmids used in this study**

| Strain/plasmid                                         | Clinical diagnosis | MRSA/MSSA | Response Profile* | $\alpha$ -toxin ( $\mu\text{g/ml}$ ) <sup>#</sup> | PVL ( $\mu\text{g/ml}$ ) <sup>#</sup> | Reference/Source                          |
|--------------------------------------------------------|--------------------|-----------|-------------------|---------------------------------------------------|---------------------------------------|-------------------------------------------|
| <b>(A) <i>S. aureus</i> strains</b>                    |                    |           |                   |                                                   |                                       |                                           |
| PUNE08 (Sa08)                                          | SSTI               | MRSA-IV   | C                 | 75                                                | 19.6                                  | <sup>3</sup>                              |
| PUNE08 agrC-Y223C                                      | -                  | MRSA-IV   | P                 | N.D                                               | N.D                                   | This study                                |
| M37 (Sa37)                                             | SSTI               | MRSA-IV   | P                 | 9                                                 | 1.5                                   | <sup>3</sup>                              |
| M37 agrC-C223Y                                         | -                  | MRSA-IV   | C                 | N.D                                               | N.D                                   | This study                                |
| Sa6454                                                 | SSTI               | MRSA-IV   | C                 | 18                                                | 1.6                                   | This study                                |
| SaN08                                                  | Meningitis         | MRSA-IV   | C                 | 32                                                | 8                                     | <sup>3</sup>                              |
| Sa113                                                  | Brain abscess      | MRSA-IV   | C                 | 20                                                | 3.2                                   | <sup>3</sup>                              |
| Sa114                                                  | Cerebral abscess   | MRSA-IV   | C                 | 23                                                | 4                                     | <sup>3</sup>                              |
| Sa754                                                  | Invasive infection | MRSA-IV   | C                 | 20                                                | 1                                     | <sup>3</sup>                              |
| Sa165                                                  | colonizing strain  | MRSA-IV   | C                 | 19.3                                              | 2.3                                   | <sup>3</sup>                              |
| Sa115                                                  | colonizing strain  | MRSA-IV   | P                 | 0.2                                               | 0.08                                  | <sup>3</sup>                              |
| <b>(B) EMRSA-15 reference <i>S. aureus</i> strains</b> |                    |           |                   |                                                   |                                       |                                           |
| HAR22                                                  | SSTI               | MRSA-IV   | C                 | N.D                                               | N.D                                   | Provided by Dr. H. Lencastre <sup>4</sup> |
| NCTC 13142                                             | SSTI               | MRSA-IV   | C                 | N.D                                               | N.D                                   | Provided by A Kearns <sup>5</sup>         |
| <b>(C) <i>E. coli</i> strains</b>                      |                    |           |                   |                                                   |                                       |                                           |
| BL21 (DE3)                                             | -                  | -         |                   |                                                   |                                       | NEB                                       |
| IM08B                                                  | -                  | -         |                   |                                                   |                                       | <sup>6</sup>                              |
| <b>(D) Plasmids</b>                                    |                    |           |                   |                                                   |                                       |                                           |
| pIMAY-Z                                                | -                  | -         |                   |                                                   |                                       | <sup>6</sup>                              |
| pET22b                                                 |                    |           |                   |                                                   |                                       | Novagen Inc.                              |
| pET28a                                                 |                    |           |                   |                                                   |                                       | <sup>7</sup>                              |

37 MRSA, methicillin-resistant *S. aureus*; MSSA, methicillin-susceptible *S. aureus*; P, proliferative; C, cytotoxic; SSTI, skin and soft tissue infection. N.D, Not  
38 determined; Names in parenthesis for strains are nomenclature based on previous publication

39 \* The response profile is determined by the pattern of proliferative responses elicited by different dilutions of bacterial supernatants against PBMC. A  
40 proliferative profile was denoted if all dilutions elicited a proliferative response. A cytotoxic pattern was denoted if a) proliferation was only noted at the highest  
41 dilution of the supernatants, and b) the supernatants (1:50 dilution) resulted in inhibition of PHA-induced responses in co-stimulation experiments.

42 #Amounts of toxins present in supernatants cultures grown to stationary phase (17hours)

43

44

45

46

47

48

49

50

51

52

53

54

55

56

57 **SupplementaryTable 2. Toxin gene profile of the clinical ST22 *S. aureus* strains.**

| Strains | ST/SPA type | <i>agr</i> type | <i>se/tsst-1/egc</i> | <i>pvl</i> | <i>lukD/E</i> | Staphylokinase | Hemolysins          | Proteases            | SSL genes        | MSCRAMM/ Adhesin                      | Capsule/ Biofilm       |
|---------|-------------|-----------------|----------------------|------------|---------------|----------------|---------------------|----------------------|------------------|---------------------------------------|------------------------|
| PUNE08  | ST22/t852   | I               | -/-/+                | +          | -             | +              | <i>hla,hlb,hld,</i> | <i>aur, sspA,B,P</i> | <i>ssl 5,7,9</i> | <i>clf A,B, cna, eno, fnbA, sdrC,</i> | 5/<br><i>ica A,C,D</i> |
| M37     | ST22/t852   | I               | -/-/+                | +          | -             | +              | <i>hla,hlb,hld,</i> | <i>aur, sspA,B,P</i> | <i>ssl 5,7,9</i> | <i>clf A,B, cna, eno, fnbA, sdrC</i>  | 5/<br><i>ica A,C,D</i> |

58 Based on gene microarray data: *se*, staphylococcal enterotoxin; *pvl*, Panton-Valentine leucocidin; *hla*, alpha-hemolysin; *hnb*, beta-hemolysin; *hld*, delta-  
59 hemolysin; *spl*, serine protease like; *sspA*, serine protease; *sspB*, cysteine protease staphopain B; *sspP*, staphopain A precursor; *ssl*, staphylococcal  
60 superantigen-like; *clf*, clumping factor; *cna*, collagen adhesins; *eno*, enolase; *fib*, fibrinogen binding-protein; *fnbA*, fibronectin A; *sdrC*, serine-aspartate repeat-  
61 containing protein C

62

63 **Supplementary Table 3. qRT-PCR and *agr*-sequencing primers used in this study**

| <b>Gene</b>                   | <b>Primer</b>    | <b>Sequence (5'-3')</b>         |
|-------------------------------|------------------|---------------------------------|
| <i>agrC</i>                   | AgrC_F           | TTATGACTTCGCAGATTATTCTGTACT     |
|                               | AgrC_R           | TAGAAAAACTTTCTTGGAAACAATTCAT    |
| <i>hla</i>                    | hla_F            | CGGCACATTTGCACCAATAAGGC         |
|                               | hla_R            | GGTTTAGCCTGGCCTTCAGC            |
| <i>RNAIII</i>                 | RNAIII_F         | GTGATGGAAAATAGTTGATGAGTTGTTT    |
|                               | RNAIII_R         | GAATTTGTTCAGTGTGTCGATAATCC      |
| <i>psma</i>                   | psma_F           | TATCAAAAAGCTTAATCGAACAATTC      |
|                               | psma_R           | CCCCTTCAAATAAGATGTTTCATATC      |
| <i>lukSPV</i>                 | lukSPV_F         | GTGTTGTTCTTCTAGTAGCATGAGT       |
|                               | lukSPV_R         | ATCACATCATTAGGTAAAATGTCTG       |
| <i>spa</i>                    | spa_F            | CAACGGAGTACATGTCGTTA            |
|                               | spa_R            | GCTTGAGCTTTGTTAGCATC            |
| <i>clfA</i>                   | clfA_F           | CAAAGGTGATTTAGCTTTACGTTCAACTT   |
|                               | clfA_R           | TGCTACTTCGTTGTCCCATGAC          |
| <i>clfB</i>                   | clfB_F           | AATGTGTTACCACTTTGATTAGGGTCAA    |
|                               | clfB_R           | GCTGCTGATGCTAAAGGTACAAATG       |
| <i>fnbA</i>                   | fnbA_F           | AACCATTATCCCAAGTTAAGGTATATCCTCT |
|                               | fnbA_R           | TGGTACTGATGAAGTTGATTTTAGAACACA  |
| <i>IL-6</i>                   | hIL-6_F          | AATTCGGTACATCCTCGACGG           |
|                               | hIL-6_R          | GGTTGTTTTCTGCCAGTGCCT           |
| <i>TNF</i>                    | hTNF_F           | TGGCCCAGGCAGTCAGA               |
|                               | hTNF_R           | GGTTTGCTACAACATGGGCTACA         |
| <i>IL-1<math>\beta</math></i> | hIL-1 $\beta$ _F | GCCCTAAACAGATGAAGTGCTC          |
|                               | hIL-1 $\beta$ _R | GAACCAGCATCTTCCTCAG             |
| <i>CXCL8</i>                  | hIL-8_F          | GAGCACTCCATAAGGCACAAA           |
|                               | hIL-8_R          | ATGGTTCCTTCCGGTGGT              |
| <i>LL37</i>                   | hLL37-F          | TCGGATGCTAACCTCTACCG            |
|                               | hLL37-R          | GTCTGGGTCCCCATCCAT              |
| <i>beta-Actin</i>             | hbetaAct_F       | CTCTTCCAGCCTTCCTTCCCT           |
|                               | hbetaAct_R       | AGCACTGTGTTGGCGTACAG            |

64

**a**

|           |                                                                              |
|-----------|------------------------------------------------------------------------------|
| PUNE08    | SQFLKEMKYKRNQEEIETYYEYTLKIEAINNEMRKRFRHDYVNI <del>LT</del> TLSE              |
| M37       | SQFLKEMKYKRNQEEIETYYE <del>CT</del> LKIEAINNEMRKRFRHDYVNI <del>LT</del> TLSE |
| HAR22     | SQFLKEMKYKRNQEEIETYYEYTLKIEAINNEMRKRFRHDYVNI <del>LT</del> TLSE              |
| NCTC13142 | SQFLKEMKYKRNQEEIETYYEYTLKIEAINNEMRKRFRHDYVNI <del>LT</del> TLSE              |
| NIM08     | SQFLKEMKYKRNQEEIETYYEYTLKIEAINNEMRKRFRHDYVNI <del>LT</del> TLSE              |
| NP113     | SQFLKEMKYKRNQEEIETYYEYTLKIEAINNEMRKRFRHDYVNI <del>LT</del> TLSE              |
| NP114     | SQFLKEMKYKRNQEEIETYYEYTLKIEAINNEMRKRFRHDYVNI <del>LT</del> TLSE              |
| GH754     | SQFLKEMKYKRNQEEIETYYEYTLKIEAINNEMRKRFRHDYVNI <del>LT</del> TLSE              |
| 165       | SQFLKEMKYKRNQEEIETYYEYTLKIEAINNEMRKRFRHDYVNI <del>LT</del> TLSE              |
| 115       | SQFLKEMKYKRNQEEIETYYE <del>CT</del> LKIEAINNEMRKRFRHDYVNI <del>LT</del> TLSE |

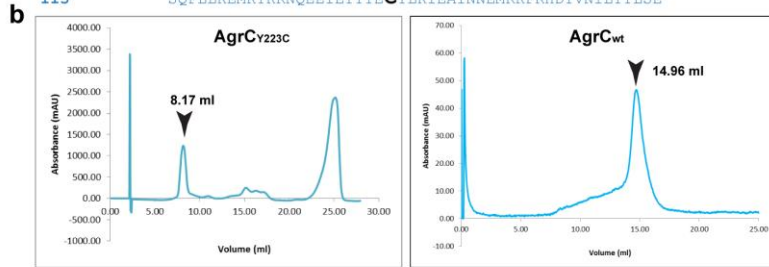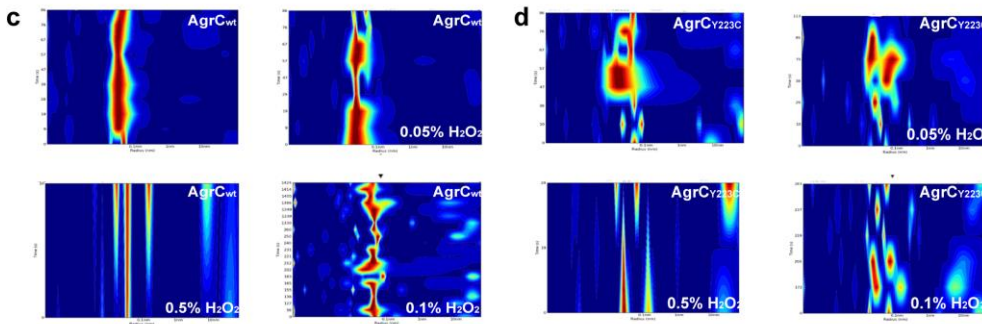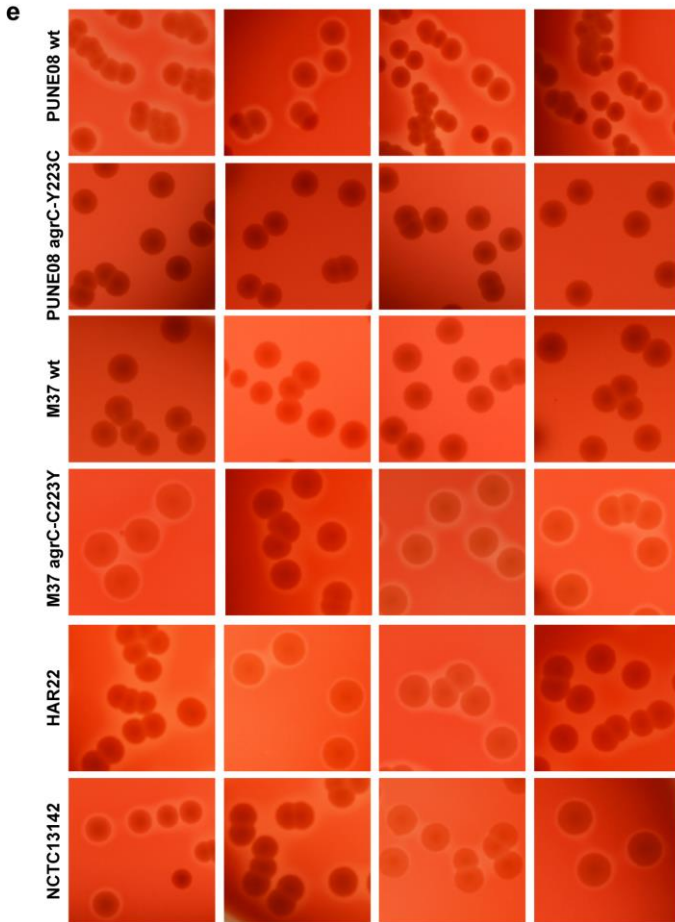

66 **Supplementary Figure 1.** Amino acid sequence variation in AgrC results in differential  
67 phenotypic response profiles of clinical ST22 *S. aureus* strains. **(a)** Amino acid sequence  
68 analysis of AgrC from indicated strains at specified positions. **(b)** Size exclusion profile of  
69 AgrC<sub>Y223C</sub> and wild-type AgrC. The chromatograms reveal that the AgrC<sub>Y223C</sub> protein is prone  
70 to aggregation and elutes in the void volume of the experiment. **(c)** DLS profile for wild-type  
71 AgrC<sub>t</sub> with increasing H<sub>2</sub>O<sub>2</sub>. **(d)** DLS profile for AgrC<sub>Y223C</sub> with increasing H<sub>2</sub>O<sub>2</sub> concentration.  
72 Addition of H<sub>2</sub>O<sub>2</sub> seemed to drastically increase the aggregation of AgrC<sub>Y223C</sub> protein. **(e)**  
73 Representative images of hemolysis on blood agar plates induced by indicated clinical and  
74 respective mutant *S. aureus* strains.  
75



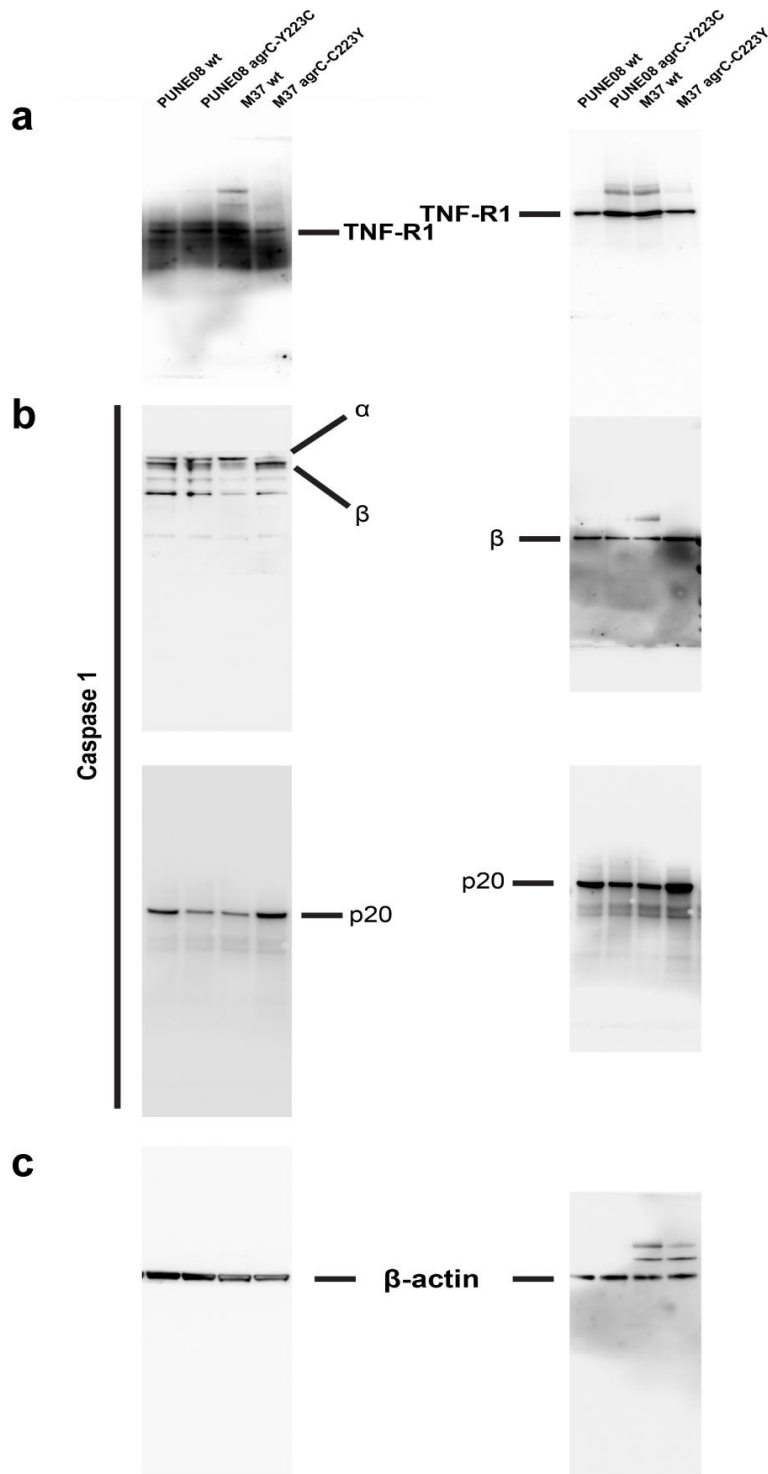

76

77 **Supplementary Figure 2.** Representative images of Western Blot analyses of (a) TNF-R1  
 78 and (b) Caspase 1 subunits expression after 2 h (left panel) and 4 h (right panel) of  
 79 keratinocytes infection. (c) β-Actin was used as a loading control (n=4). Uncropped full-size  
 80 blots are shown.

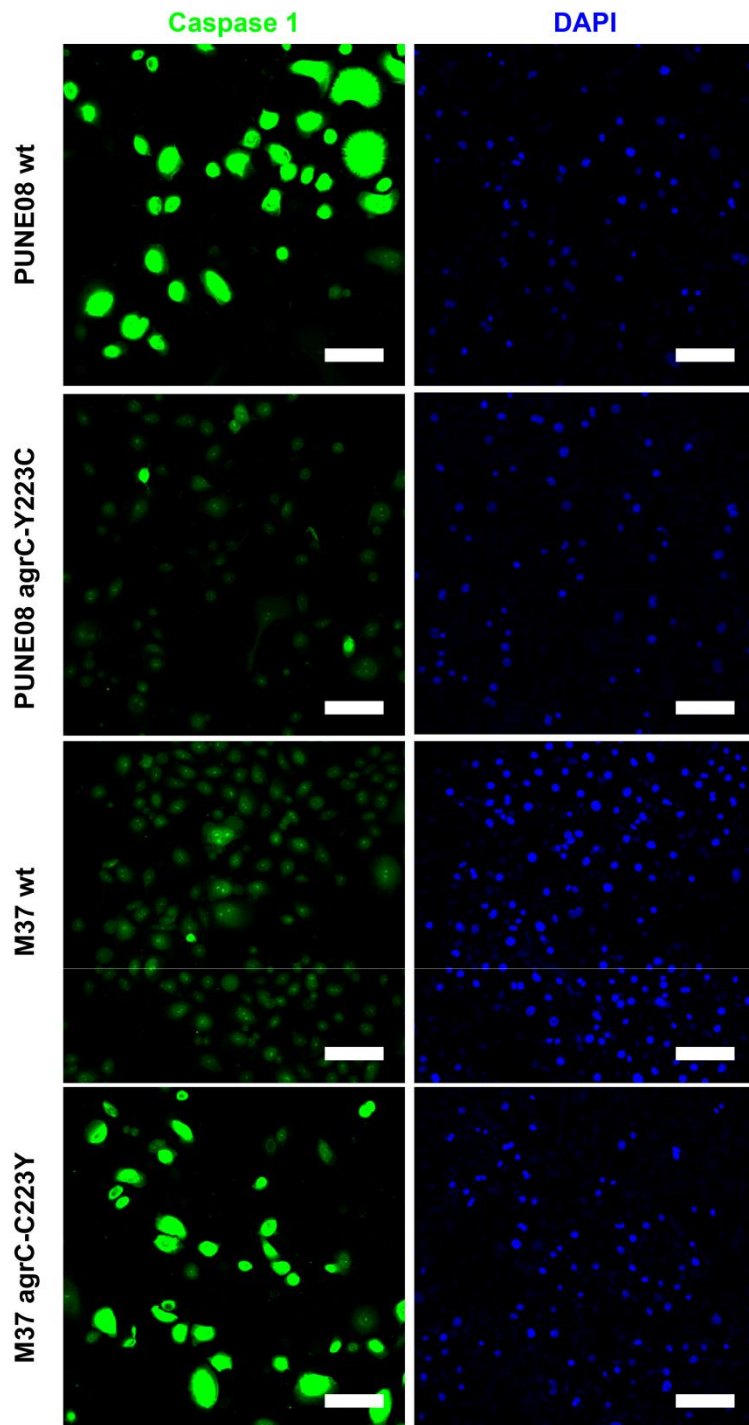

81

82 **Supplementary Figure 3.** Cytotoxic strains induce caspase 1 activation in infected  
 83 keratinocytes. Representative single channel images of Caspase 1 (green; left panel)  
 84 secretion and DAPI (blue; right panel) after 2 h of keratinocytes monolayer infection with  
 85 indicated strains. The scale bars in images equal 60  $\mu$ m.

86

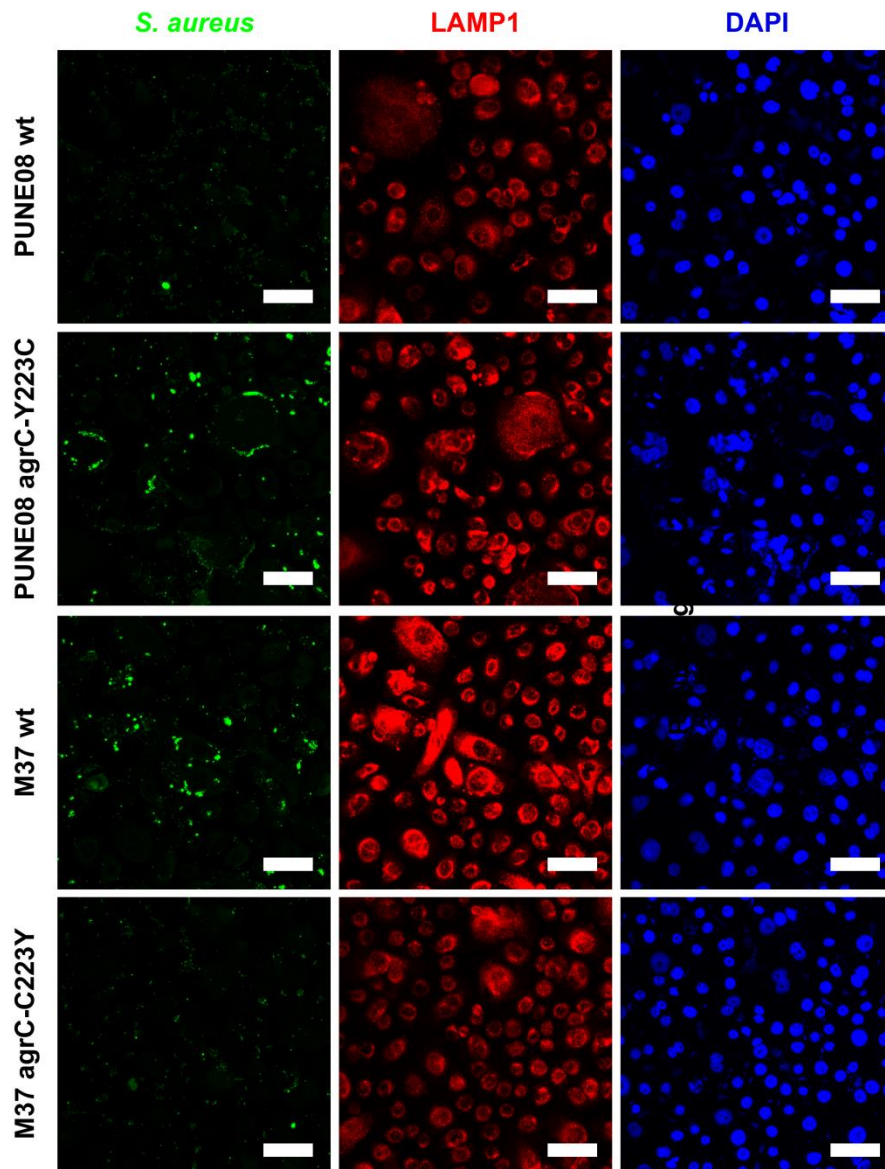

87

88 **Supplementary Figure 4.** *S. aureus* strains exhibiting colonizing phenotype reside within  
 89 phagolysosome in infected Keratinocytes. Representative single channel images of LAMP1  
 90 (red; center panel), DAPI (blue; right panel) and *S. aureus* (green; left panel) co-localization  
 91 in infected keratinocytes monolayers after 2 h of infection. The scale bars in images equal  
 92 60  $\mu\text{m}$ .

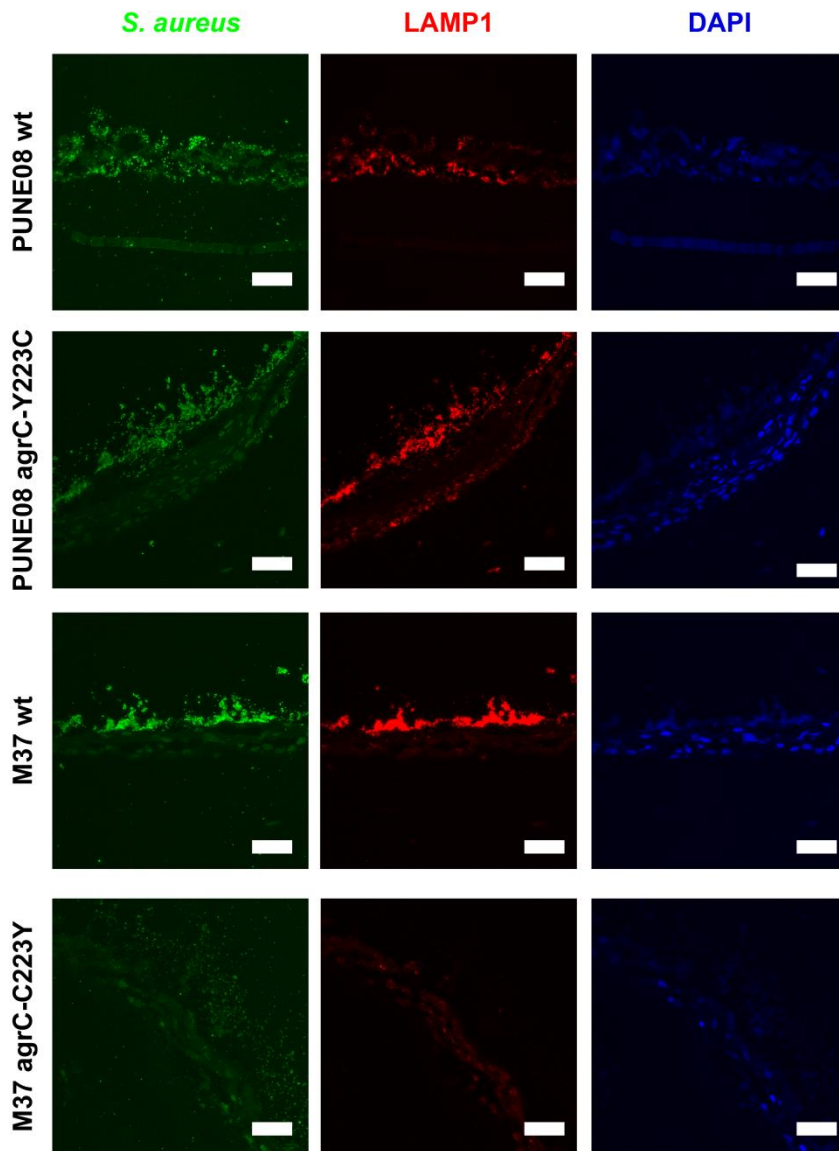

93

94 **Supplementary Figure 5.** *S. aureus* strains exhibiting colonizing phenotype reside within  
 95 phagolysosome in infected skin tissue models. Representative single channel images of  
 96 LAMP1 (red; center panel), DAPI (blue; right panel) and *S. aureus* (green; left panel) co-  
 97 localization in infected skin tissue models after 24 h of infection. The scale bars in images  
 98 equal 60  $\mu$ m.

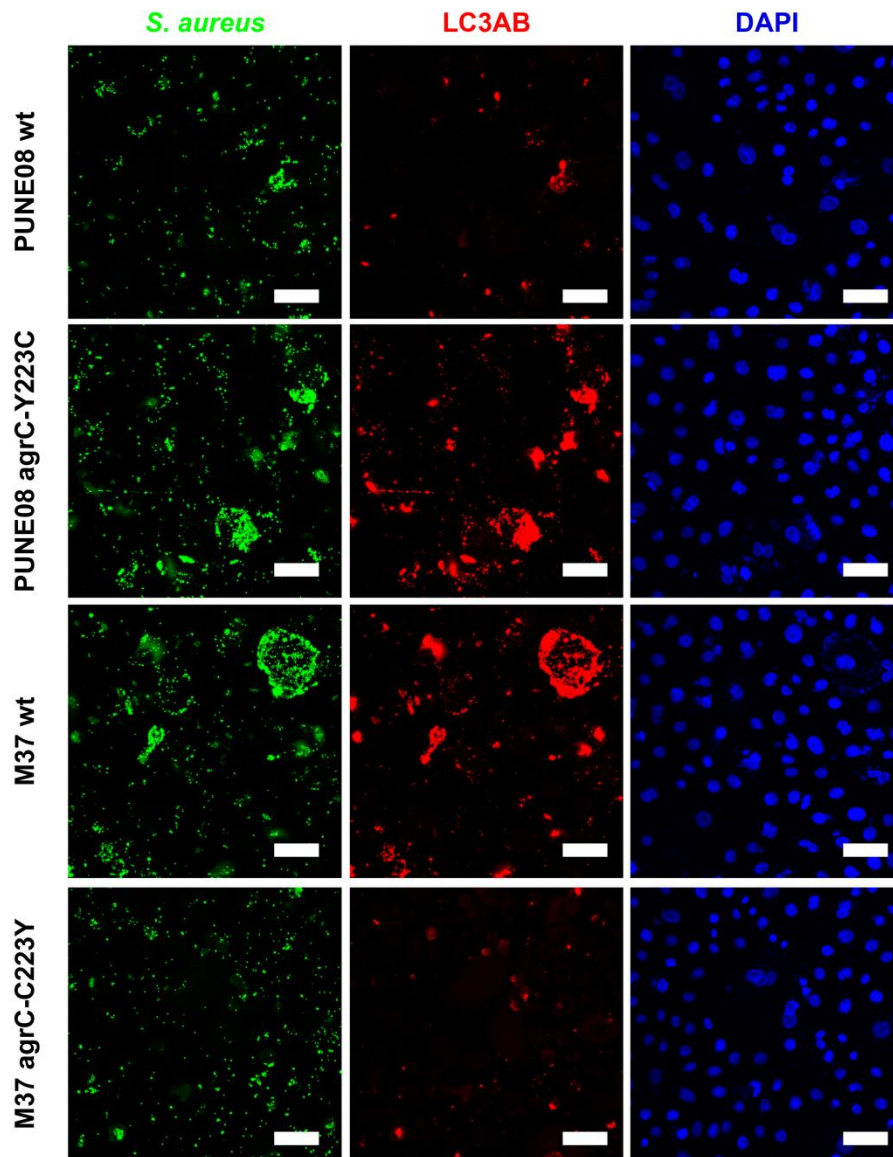

99

100 **Supplementary Figure 6.** *S. aureus* strains exhibiting colonizing phenotype induce  
 101 autophagy in infected Keratinocytes. Representative single channel images of LC3AB (red;  
 102 center panel), DAPI (blue; right panel) and *S. aureus* (green; left panel) co-localization in  
 103 infected keratinocytes monolayers after 2 h of infection. The scale bars in images equal  
 104 60  $\mu$ m.



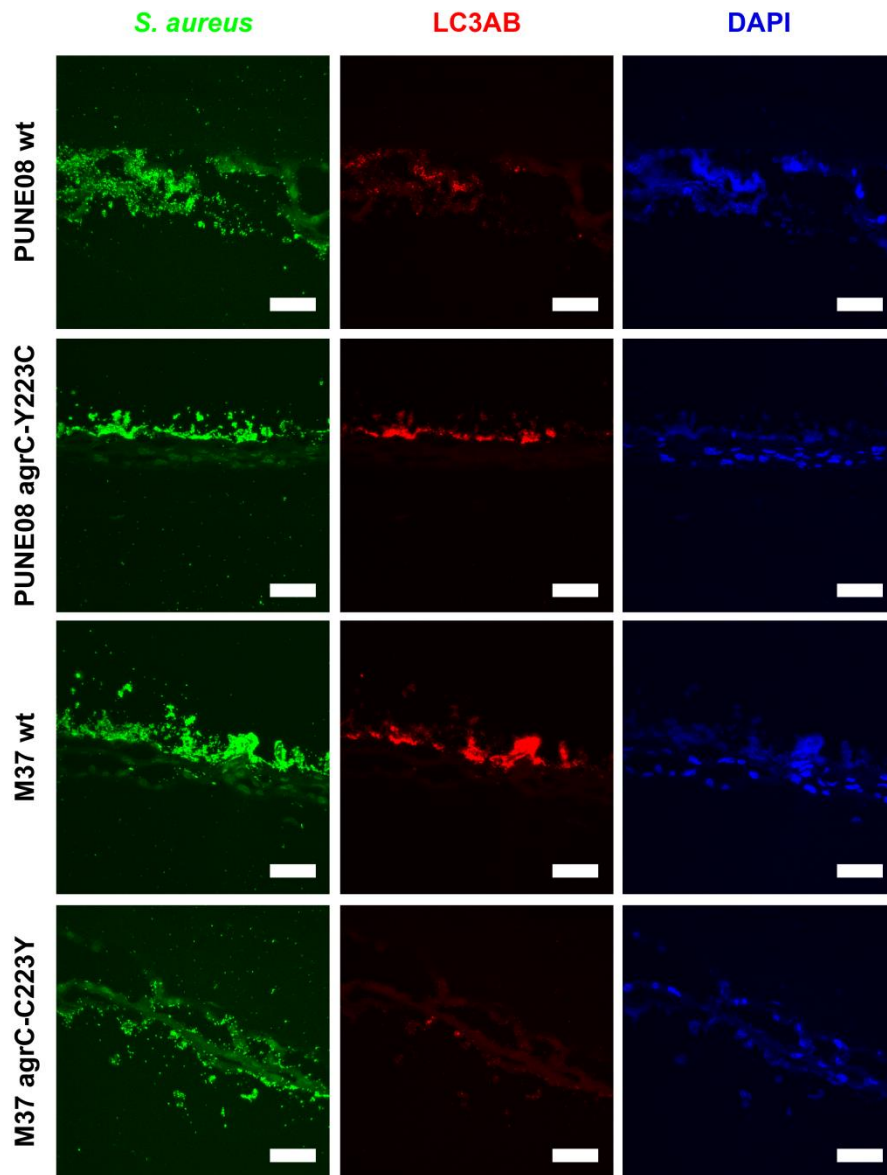

105

106 **Supplementary Figure 7.** *S. aureus* strains exhibiting colonizing phenotype induce  
 107 autophagy in infected skin tissue models. Representative single channel images of LC3AB  
 108 (red; center panel), DAPI (blue; right panel) and *S. aureus* (green; left panel) co-localization  
 109 in infected skin tissue models after 24 h of infection. The scale bars in images equal 60  $\mu$ m.

110

111

112 **References**

- 113 1 Badiou, C. *et al.* Rapid detection of *Staphylococcus aureus* Panton-Valentine leukocidin in  
114 clinical specimens by enzyme-linked immunosorbent assay and immunochromatographic  
115 tests. *J. Clin. Microbiol.* **48**, 1384-1390, doi:10.1128/JCM.02274-09 (2010).
- 116 2 Diep, B. A. *et al.* Effects of linezolid on suppressing in vivo production of staphylococcal toxins  
117 and improving survival outcomes in a rabbit model of methicillin-resistant *Staphylococcus*  
118 *aureus* necrotizing pneumonia. *J. Infect. Dis.* **208**, 75-82, doi:10.1093/infdis/jit129 (2013).
- 119 3 Mairpady Shambat, S. *et al.* Levels of alpha-toxin correlate with distinct phenotypic response  
120 profiles of blood mononuclear cells and with agr background of community-associated  
121 *Staphylococcus aureus* isolates. *PLoS One* **9**, e106107, doi:10.1371/journal.pone.0106107  
122 (2014).
- 123 4 Milheirico, C., Oliveira, D. C. & de Lencastre, H. Multiplex PCR strategy for subtyping the  
124 staphylococcal cassette chromosome mec type IV in methicillin-resistant *Staphylococcus*  
125 *aureus*: 'SCCmec IV multiplex'. *J. Antimicrob. Chemother.* **60**, 42-48, doi:10.1093/jac/dkm112  
126 (2007).
- 127 5 Jenkins, R., Burton, N. & Cooper, R. Manuka honey inhibits cell division in methicillin-  
128 resistant *Staphylococcus aureus*. *J. Antimicrob. Chemother.* **66**, 2536-2542,  
129 doi:10.1093/jac/dkr340 (2011).
- 130 6 Monk, I. R., Tree, J. J., Howden, B. P., Stinear, T. P. & Foster, T. J. Complete Bypass of  
131 Restriction Systems for Major *Staphylococcus aureus* Lineages. *MBio* **6**, e00308-00315,  
132 doi:10.1128/mBio.00308-15 (2015).
- 133 7 Srivastava, S. K., Rajasree, K., Fasim, A., Arakere, G. & Gopal, B. Influence of the AgrC-AgrA  
134 complex on the response time of *Staphylococcus aureus* quorum sensing. *J. Bacteriol.* **196**,  
135 2876-2888, doi:10.1128/JB.01530-14 (2014).

136

137
